# Supplementary material for: Adverse Childhood Experiences and Sleep Disturbances Among Puerto Rican Young Adults
Source: PubMed Central journal article supplement (PMC11036138; doi:10.1001/jamanetworkopen.2024.7532), 2024-04-22
Supplement: jamanetwopen-e247532-s001.pdf [file jamanetwopen-e247532-s001.pdf]

## Data Sharing Statement

Olsen. Adverse Childhood Experiences and Sleep Disturbances Among Puerto Rican Young Adults. *JAMA Netw Open*. Published April 22, 2024. doi:10.1001/jamanetworkopen.2024.7532

### Data

**Data available:** No. The authors decline to share the data used in this study. Please direct all inquiries to the study investigators.
